# Supplementary material for: Cell cycle regulators control mesoderm specification in human pluripotent stem cells
Source: PubMed Central journal article supplement (PMC6879335; doi:10.1074/jbc.ra119.008251), 2019-09-12
Supplement: supp_RA119.008251_144064_2_supp_391989_pxkdl2.pdf [file supp_RA119.008251_144064_2_supp_391989_pxkdl2.pdf]

# Cell cycle regulators control mesoderm specification in human pluripotent stem cells

Loukia Yiangou, Rodrigo A. Grandy, Anna Osnato, Daniel Ortmann, Sanjay Sinha, and Ludovic Vallier

## Material Included

- Results: Figure S1-S2
- Experimental procedures

## Results

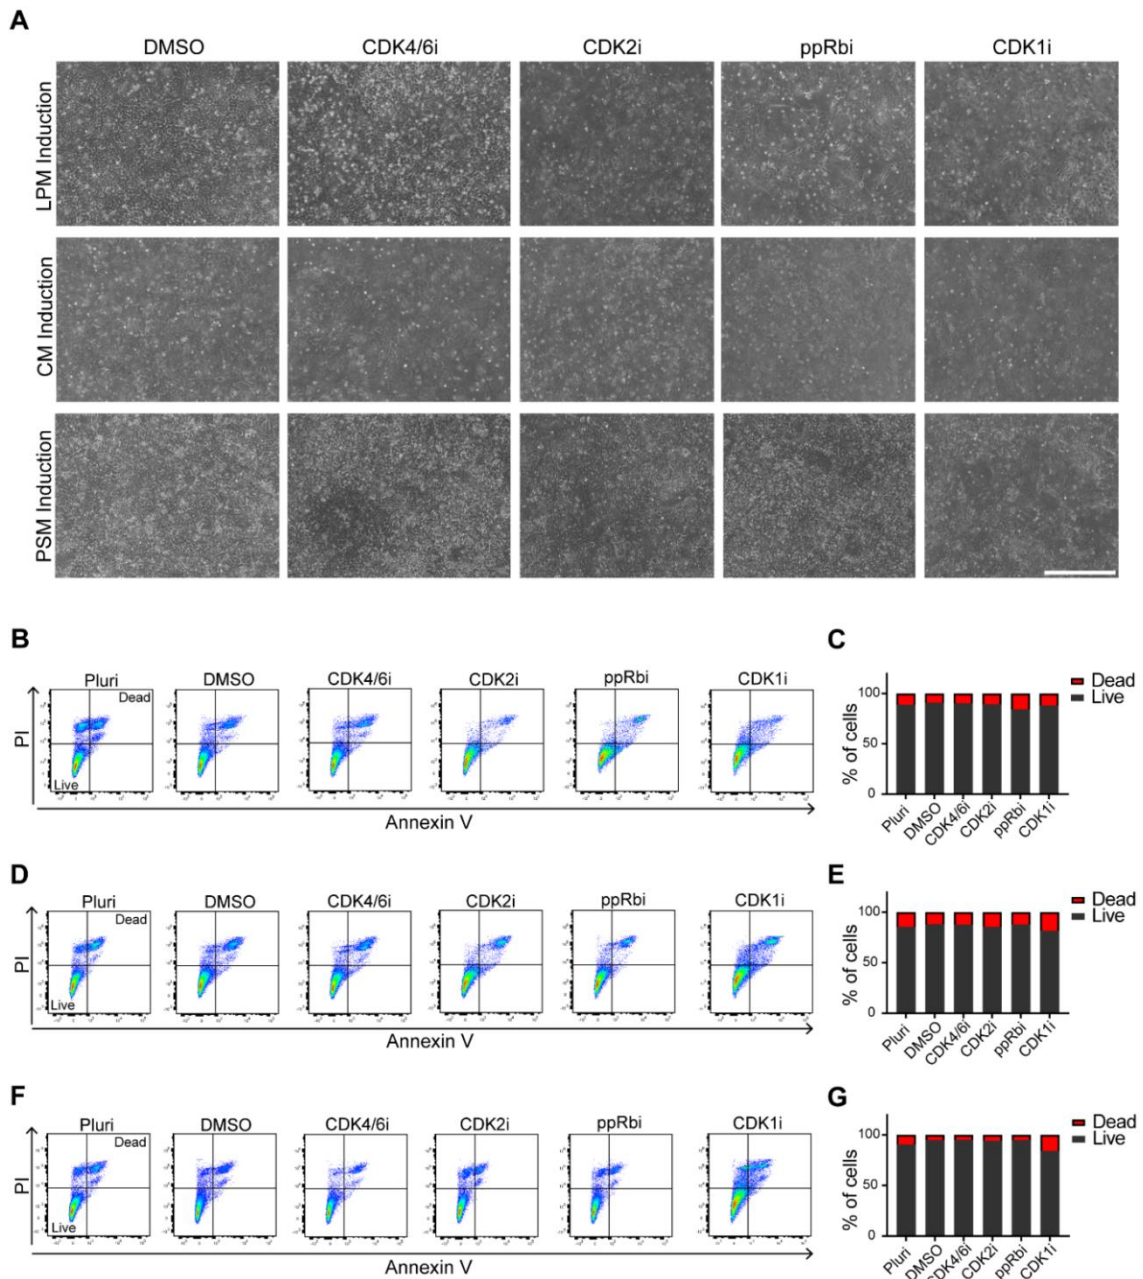

**FIGURE S1. Treatment with small molecule cell cycle inhibitors does not cause apoptosis and cell death.** *A*, Brightfield images of cells following mesoderm subtype induction in the presence of the small molecule cell cycle inhibitors. Scale bar: 1000 $\mu$ m. *B*, Flow cytometry analysis for Annexin V and Propidium iodide (PI) positive cells and *C*, Bar graph summarising flow cytometry results during LPM induction. *D*, Flow cytometry analysis for Annexin V and Propidium iodide (PI) positive cells and *E*, Bar graph summarising flow cytometry results during CM induction. *F*, Flow cytometry analysis for Annexin V and Propidium iodide (PI) positive cells and *G*, Bar graph summarising flow cytometry results during PSM induction.

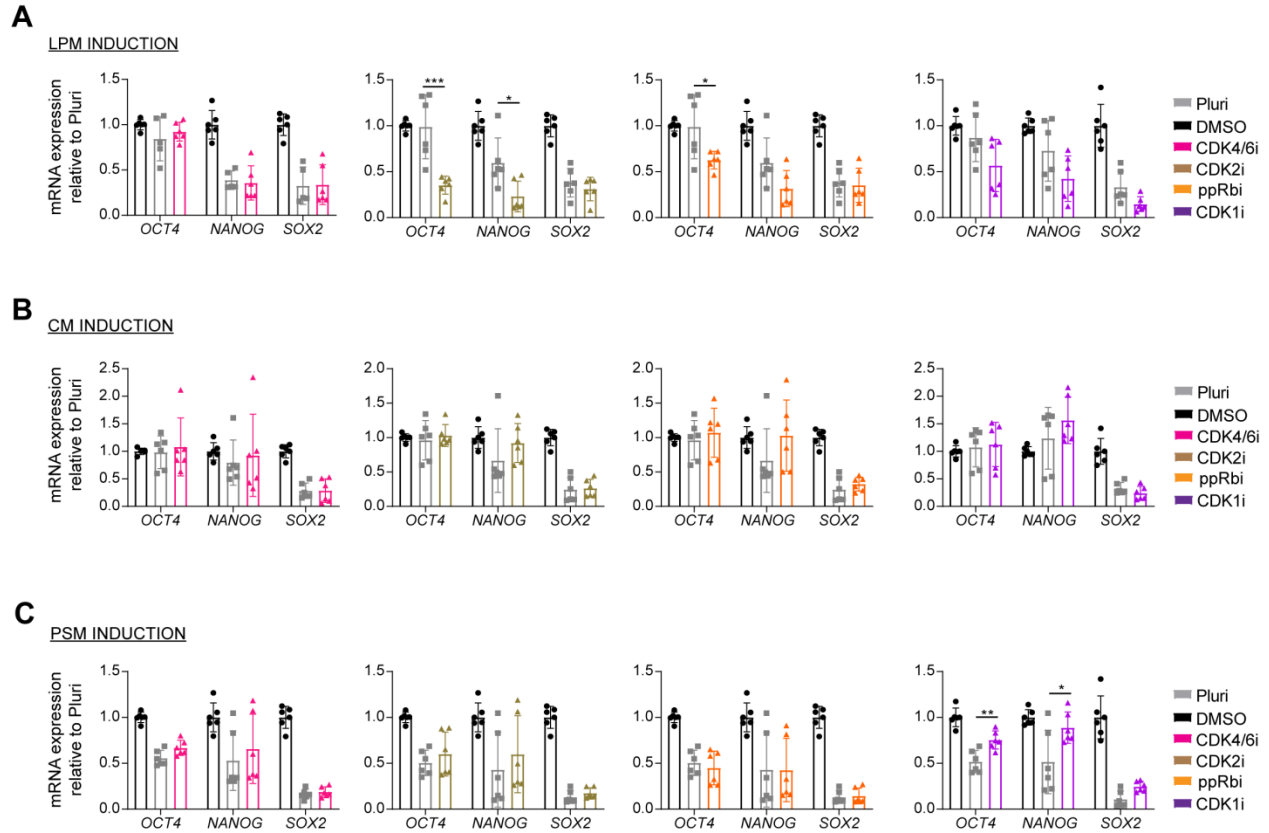

**FIGURE S2. Inhibition of G1 and G2/M cell cycle regulators affects pluripotency gene expression.** *A-C*, RT-qPCR analysis for expression of the pluripotency markers *OCT4*, *NANOG* and *SOX2* and *HAND1* during LPM induction (*A*), CM induction (*B*) and PSM induction (*C*) upon treatment with inhibitors of G1 and G2/M cell cycle regulators. Error bars represent  $\pm$ SEM (n=3). Ordinary one-way ANOVA test followed by Tukey's test for multiple comparisons was performed. Differences between DMSO and inhibitor treated cells are shown \*p<0.05, \*\*p<0.01, \*\*\*p<0.001, \*\*\*\*p<0.0001.

## Experimental procedures

### Smooth Muscle Cell Differentiation

For smooth muscle cell formation, LPM cells were dissociated with TrypLE Express (Life Technologies) for 5 minutes at 37°C, washed once with CDM-PVA and centrifuged at 200g for 3 minutes. Cells were seeded on gelatin and MEF medium coated plates at a density of  $2.6 \times 10^4$  cells/cm<sup>2</sup> in CDM-PVA supplemented with 10ng/ml PDGF-BB (Peprotech) and 2ng/ml TGF- $\beta$  (Peprotech) for 12 days. Media was changed every two days and cells split when confluent at a 1:2 ratio usually on day 3 or day 6.

### Cardiomyocyte Differentiation

Following cardiac mesoderm formation, cells were cultured for two days in CDM-BSA (with insulin) supplemented with 8ng/ml FGF2 and 10ng/ml BMP4 (R&D) and subsequently fed every two days with CDM-BSA (with insulin). Onset of beating was observed on day 7-9 of differentiation.

### Chondrocyte Differentiation

Following presomitic mesoderm formation, cells were cultured in CDM-BSA (with insulin) supplemented with 8ng/ml FGF2 and 10ng/ml BMP4 (R&D) for 10 days, changing media every two days.

Cells were treated with the small molecule inhibitors presented in table S1 and a number of different doses were tested. The inhibitors used are as follows:

**Table S1. Small molecule cell cycle inhibitors used**

| Inhibitor   | Concentrations used | Catalogue Number | Supplier      |
|-------------|---------------------|------------------|---------------|
| PD-0332991  | 5 $\mu$ M           | S1116            | Selleckchem   |
| RO-3306     | 10 $\mu$ M          | S7747            | Selleckchem   |
| Roscovitine | 4 $\mu$ M           | R7772            | Sigma-Aldrich |
| RRD-251     | 10 $\mu$ M          | R7532            | Sigma-Aldrich |

**Table S2. qPCR primers used**

| Gene          | Forward Primer (5'-3') | Reverse Primer (5'-3')  |
|---------------|------------------------|-------------------------|
| <i>ACAN</i>   | CCCCTGCTATTTTCATCGACCC | GACACACGGCTCCACTTGAT    |
| <i>ACTN2</i>  | CAAACCTGACCGGGGAAAAT   | CTGAATAGCAAAGCGAAGGATGA |
| <i>CDX2</i>   | GGCAGCCAAGTGAAAACCAG   | TTCCTCTCCTTTGCTCTGCG    |
| <i>CNN1</i>   | GTCCACCCTCCTGGCTTT     | AAACTTGTTGGTGCCCATCT    |
| <i>COL2A1</i> | TGGACGCCATGAAGGTTTCT   | TGGGAGCCAGATTGTCATCTC   |
| <i>EOMES</i>  | ATCATTACGAAACAGGGCAGGC | CGGGGTGGTATTTGTGTAAGG   |
| <i>HAND1</i>  | GTGCGTCCTTTAATCCTCTTC  | GTGAGAGCAAGCGGAAAAG     |
| <i>MIXL1</i>  | GGTACCCCGACATCCACTTG   | TAATCTCCGGCCTAGCCAAA    |
| <i>NANOG</i>  | CATGAGTGTGGATCCAGCTTG  | CCTGAATAAGCAGATCCATGG   |

|                                  |                       |                           |
|----------------------------------|-----------------------|---------------------------|
| <i>NKX2.5</i>                    | GAGCCGAAAAGAAAGCCTGAA | CACCGACACGTCTCACTCAG      |
| <i>PBGD</i>                      | GGAGCCATGTCTGGTAACGG  | CCACGCGAATCACTCTCATCT     |
| <i>T</i><br>( <i>BRACHYURY</i> ) | TGCTTCCCTGAGACCCAGTT  | GATCACTTCTTTCCCTTGCATCAAG |
| <i>TAGLN</i>                     | TCTTTGAAGGCAAAGACATGG | TTATGCTCCTGCGCTTTCTT      |
| <i>TNNT2</i>                     | ACAGAGCGGAAAAGTGGGAAG | TCGTTGATCCTGTTTCGGAGA     |

**Table S3. Antibodies used for immunocytochemistry analysis**

| <b>Antibody</b>                    | <b>Species</b> | <b>Dilution</b> | <b>Catalogue Number</b> | <b>Manufacturer</b>      |
|------------------------------------|----------------|-----------------|-------------------------|--------------------------|
| BRACHYURY                          | Goat           | 1:200           | AF2085                  | R&D Systems              |
| CARDIAC TROPONIN T                 | Rabbit         | 1:500           | Ab45932                 | Abcam                    |
| EOMES                              | Mouse          | 1:200           | MAB6166                 | R&D Systems              |
| NKX2.5                             | Goat           | 1:500           | sc-14033                | Santa Cruz Biotechnology |
| PAX3                               | Mouse          | 1:100           | -                       | Dev. Hybridoma Bank      |
| SM22a/TAGLN                        | Rabbit         | 1:1,000         | ab-14106                | Abcam                    |
| Alexa Fluor 488 donkey anti-goat   | -              | 1:1,000         | A11055                  | Invitrogen               |
| Alexa Fluor 488 donkey anti-mouse  | -              | 1:1,000         | A21202                  | Invitrogen               |
| Alexa Fluor 488 donkey anti-rabbit | -              | 1:1,000         | A21206                  | Invitrogen               |
| Alexa Fluor 647 donkey anti-goat   | -              | 1:1,000         | A21447                  | Invitrogen               |
| Alexa Fluor 647 donkey anti-mouse  | -              | 1:1,000         | A31571                  | Invitrogen               |
| Alexa Fluor 647 donkey anti-rabbit | -              | 1:1,000         | A31573                  | Invitrogen               |

**Table S4. CDK1 shRNA sequences**

| <b>Top Oligo</b>                                                       | <b>Bottom Oligo</b>                                                    |
|------------------------------------------------------------------------|------------------------------------------------------------------------|
| GATCCCGCTGTA CTTCGTCTTCTAATTCTC<br>GAGAATTAGAAGACGAAGTACAGCTTTTT<br>TG | TCGACAAAAAAGCTGTA CTTCGTCTTCTAA<br>TTCTCGAGAATTAGAAGACGAAGTACAGC<br>GG |

**Table S5. Primary antibodies used for Western blot analysis**

| <b>Antibody</b>                                     | <b>Species</b>           | <b>Dilution</b> | <b>Catalogue Number</b> | <b>Manufacturer</b>        |
|-----------------------------------------------------|--------------------------|-----------------|-------------------------|----------------------------|
| Phospho-Smad1/5<br>(Ser463/465) (41D10)             | Rabbit<br>(Biotinylated) | 1:500           | 9516S                   | Cell Signalling Technology |
| Smad1                                               | Rabbit                   | 1:500           | 9743S                   | Cell Signalling Technology |
| Phospho- $\beta$ -catenin<br>(Ser33/37/Thr41)       | Rabbit                   | 1:1,000         | 9561S                   | Cell Signalling Technology |
| $\beta$ -catenin                                    | Goat                     | 1:1,000         | AF1329                  | R&D Systems                |
| Phospho-p44/p42<br>MAPK (Erk1/2)<br>(Thr202/Tyr204) | Rabbit                   | 1:1,000         | 9101S                   | Cell Signalling Technology |
| p44/42 MAPK<br>(Erk1/2)                             | Rabbit<br>(Biotinylated) | 1:1,000         | 9102S                   | Cell Signalling Technology |
| A-tubulin                                           | Mouse                    | 1:40,000        | T9026                   | Sigma-Aldrich              |
| B-actin                                             | Mouse                    | 1:40,000        | A2228                   | Sigma-Aldrich              |
| Anti-CDK1                                           | Rabbit                   | 1:2,000         | Ab133327                | Abcam                      |
| Histone H3                                          | Rabbit                   | 1:40,000        | H0164                   | Sigma-Aldrich              |
| Anti-goat HRP                                       | -                        | 1:10,000        | A5420                   | Sigma-Aldrich              |
| Anti-rabbit HRP                                     | -                        | 1:10,000        | A0545                   | Sigma-Aldrich              |
| Anti-mouse HRP                                      | -                        | 1:10,000        | A2554                   | Sigma-Aldrich              |
| Streptavidin-HRP                                    | -                        | 1:2,000         | 3999S                   | Cell Signalling Technology |
